# Supplementary material for: High mobility and excellent thermoelectric performance monolayer ZnX2Z4 (X = In, Al, Ga; Z = S, Se, Te) materials
Source: Royal Society of Chemistry journal article supplement (doi:10.1039/d3cp00594a), 2023-01-01
Supplement: d3cp00594a1.pdf [file d3cp00594a1.pdf]

## Supporting Information for

### High Mobility and Ultra-low Lattice Thermal Materials of Monolayer

### ZnX<sub>2</sub>Z<sub>4</sub> (X=In, Al, Ga; Z=S, Se, Te)

Li Shi<sup>a,b</sup>, Chunyan Lv<sup>\*b</sup>, Haoran Wei<sup>a</sup>, Wangping Xu<sup>\*c</sup>, Rui Wang<sup>a</sup>, Jing Fan<sup>d</sup>, and Xiaozhi Wu<sup>\*a</sup>

*a: Institute for Structure and Function and Department of Physics, Chongqing University, Chongqing 401331, P. R. China*

*b: Department of Materials Chemistry, Huzhou University, Huzhou 313000, P. R. China*

*c: Hunan Institute of Advanced Sensing and Information Technology, Xiangtan University, Xiangtan 411105, P. R. China*

*d: Center for Computational Science and Engineering, Southern University of Science and Technology, Shenzhen 518055, P. R. China*

**Table S1.** Cohesive energy for  $\beta_2$ -ZnX<sub>2</sub>Z<sub>4</sub> (X= In, Al, and Ga; Z = S, Se, and Te) was obtained by PBE level.

| Structure                                    | E <sub>coh</sub> (eV)/atom | Structure                                    | E <sub>coh</sub> (eV)/atom | Structure                                    | E <sub>coh</sub> (eV)/atom |
|----------------------------------------------|----------------------------|----------------------------------------------|----------------------------|----------------------------------------------|----------------------------|
| $\beta_2$ -ZnIn <sub>2</sub> S <sub>4</sub>  | -3.076                     | $\beta_2$ -ZnAl <sub>2</sub> S <sub>4</sub>  | -3.965                     | $\beta_2$ -ZnGa <sub>2</sub> S <sub>4</sub>  | -3.457                     |
| $\beta_2$ -ZnIn <sub>2</sub> Se <sub>4</sub> | -2.873                     | $\beta_2$ -ZnAl <sub>2</sub> Se <sub>4</sub> | -3.460                     | $\beta_2$ -ZnGa <sub>2</sub> Se <sub>4</sub> | -3.022                     |
| $\beta_2$ -ZnIn <sub>2</sub> Te <sub>4</sub> | -2.493                     | $\beta_2$ -ZnAl <sub>2</sub> Te <sub>4</sub> | -2.895                     | $\beta_2$ -ZnGa <sub>2</sub> Te <sub>4</sub> | -2.577                     |

**Table S2.** The Elastic constants  $C_{ij}$  of the  $\beta_2$ -ZnX<sub>2</sub>Te<sub>4</sub> (X= Al, Ga, and In) monolayer.

| Monolayer                                    | C <sub>11</sub> (N/m) | C <sub>12</sub> (N/m) | C <sub>22</sub> (N/m) | C <sub>66</sub> (N/m) |
|----------------------------------------------|-----------------------|-----------------------|-----------------------|-----------------------|
| $\beta_2$ -ZnAl <sub>2</sub> Te <sub>4</sub> | 86.19                 | 30.84                 | 89.43                 | 29.58                 |
| $\beta_2$ -ZnGa <sub>2</sub> Te <sub>4</sub> | 83.13                 | 32.74                 | 86.33                 | 27.43                 |
| $\beta_2$ -ZnIn <sub>2</sub> Te <sub>4</sub> | 63.13                 | 28.11                 | 67.87                 | 20.05                 |

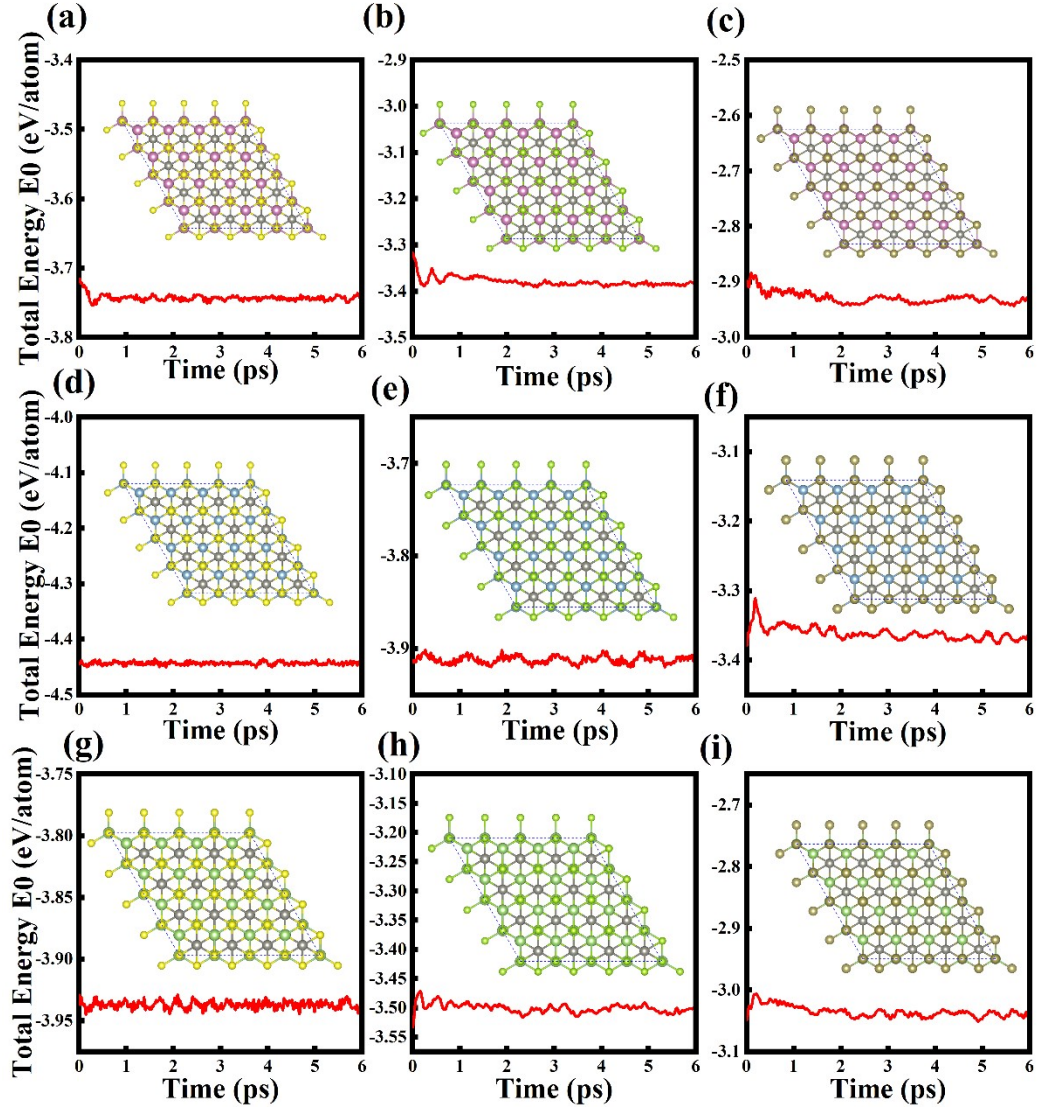

**Figure S1.** AIMD simulation of 6 ps in (a)  $\beta_2$ -ZnIn<sub>2</sub>S<sub>4</sub>, (b)  $\beta_2$ -ZnIn<sub>2</sub>Se<sub>4</sub>, (c)  $\beta_2$ -ZnIn<sub>2</sub>Te<sub>4</sub>, (d)  $\beta_2$ -ZnAl<sub>2</sub>S<sub>4</sub>, (e)  $\beta_2$ -ZnAl<sub>2</sub>Se<sub>4</sub>, (f)  $\beta_2$ -ZnAl<sub>2</sub>Te<sub>4</sub>, (g)  $\beta_2$ -ZnGa<sub>2</sub>S<sub>4</sub>, (h)  $\beta_2$ -ZnGa<sub>2</sub>Se<sub>4</sub>, and (i)  $\beta_2$ -ZnGa<sub>2</sub>Te<sub>4</sub> at 300 K.

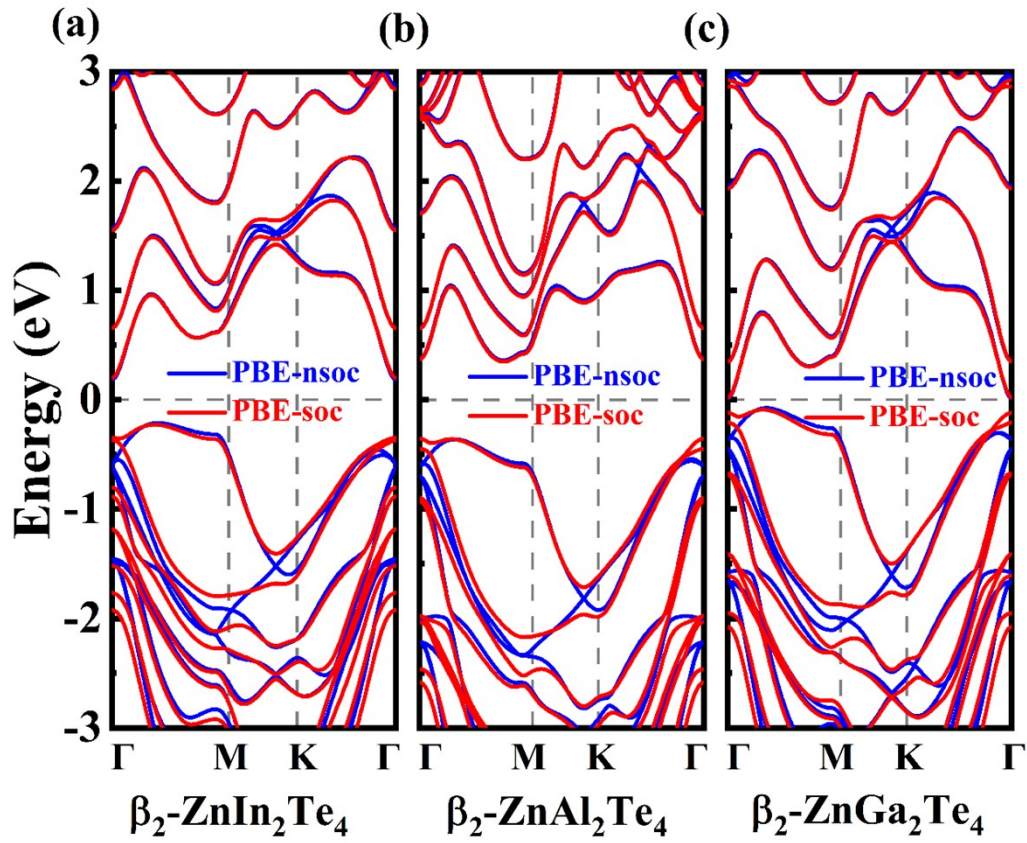

**Figure S2.** (a-c) The calculated band structure without (blue line) and with (red line) SOC of monolayer  $\beta_2\text{-ZnX}_2\text{Te}_4$  ( $X=\text{In, Al and Ga}$ ) by PBE level.

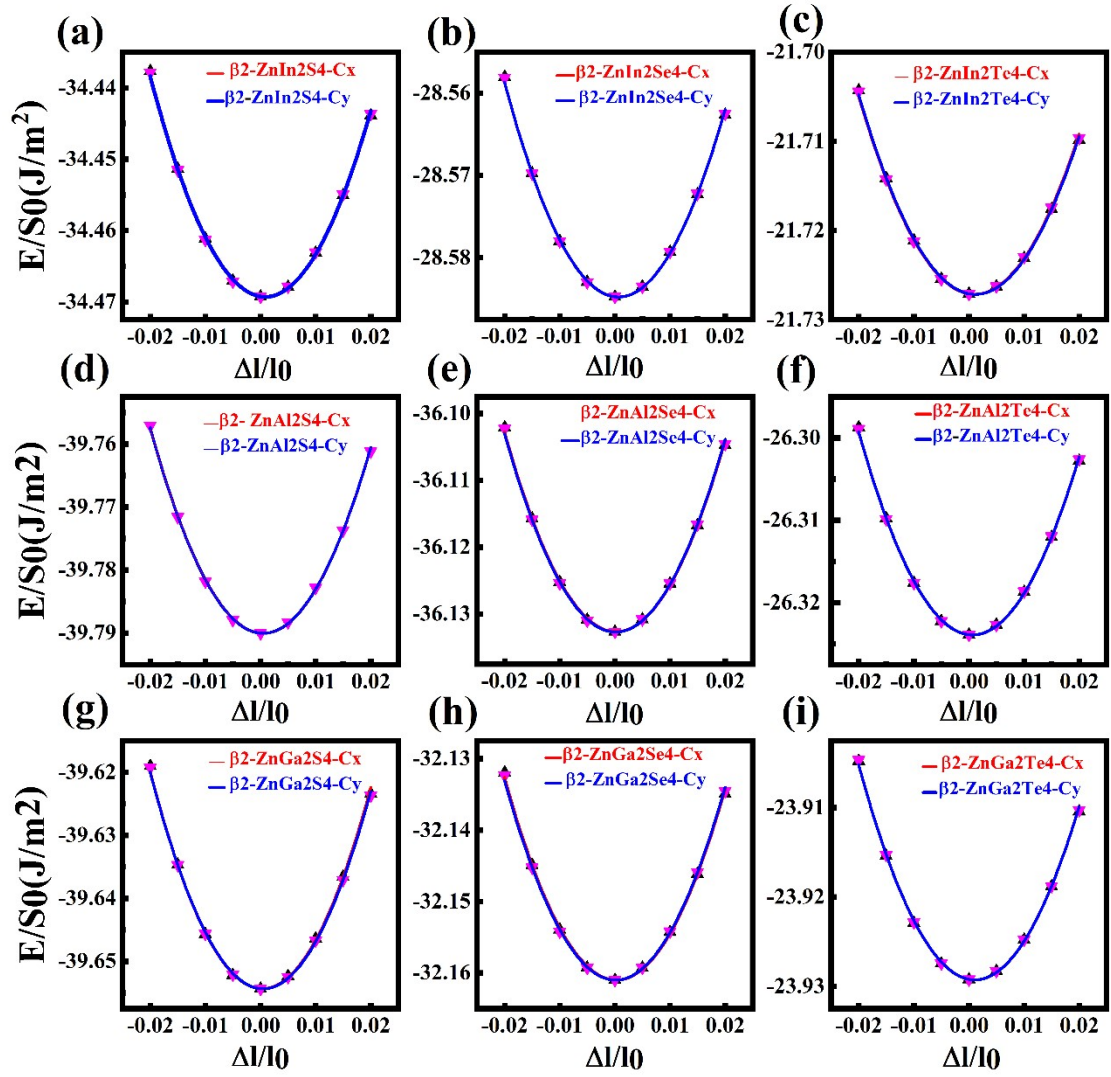

**Figure S3.** Monolayer (a)  $\beta_2$ -ZnIn<sub>2</sub>S<sub>4</sub>, (b)  $\beta_2$ -ZnIn<sub>2</sub>Se<sub>4</sub>, (c)  $\beta_2$ -ZnIn<sub>2</sub>Te<sub>4</sub>, (d)  $\beta_2$ -ZnAl<sub>2</sub>S<sub>4</sub>, (e)  $\beta_2$ -ZnAl<sub>2</sub>Se<sub>4</sub>, (f)  $\beta_2$ -ZnAl<sub>2</sub>Te<sub>4</sub>, (g)  $\beta_2$ -ZnGa<sub>2</sub>S<sub>4</sub>, (h)  $\beta_2$ -ZnGa<sub>2</sub>Se<sub>4</sub>, and (i)  $\beta_2$ -ZnGa<sub>2</sub>Te<sub>4</sub> are the x(zigzag) directions of uniaxial strain and the y(armchair) directions of unstrained strain. The in-plane stiffness  $C_{2D}$  can be obtained by fitting the parabola.

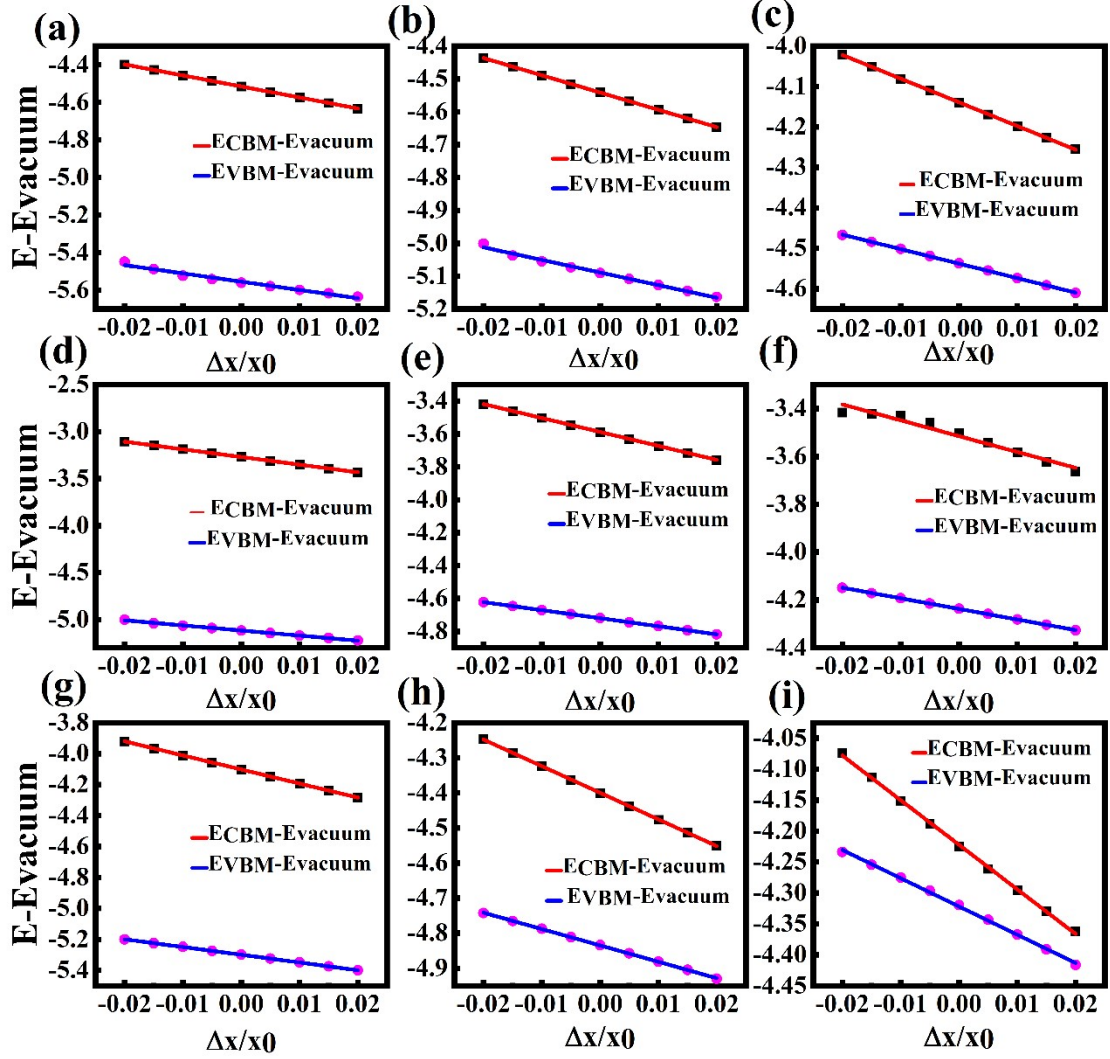

**Figure S4.** Monolayer (a)  $\beta_2$ -ZnIn<sub>2</sub>S<sub>4</sub>, (b)  $\beta_2$ -ZnIn<sub>2</sub>Se<sub>4</sub>, (c)  $\beta_2$ -ZnIn<sub>2</sub>Te<sub>4</sub>, (d)  $\beta_2$ -ZnAl<sub>2</sub>S<sub>4</sub>, (e)  $\beta_2$ -ZnAl<sub>2</sub>Se<sub>4</sub>, (f)  $\beta_2$ -ZnAl<sub>2</sub>Te<sub>4</sub>, The energy difference and vacuum energy of (g)  $\beta_2$ -ZnGa<sub>2</sub>S<sub>4</sub>, (h)  $\beta_2$ -ZnGa<sub>2</sub>Se<sub>4</sub>, and (i)  $\beta_2$ -ZnGa<sub>2</sub>Te<sub>4</sub> CBMs and VBMs are functions of lattice expansion along the x(zigzag) direction, respectively. The slope of the blue and red lines corresponds to the DP (Deformation Potential) constant of the hole and electron in a different direction, respectively.



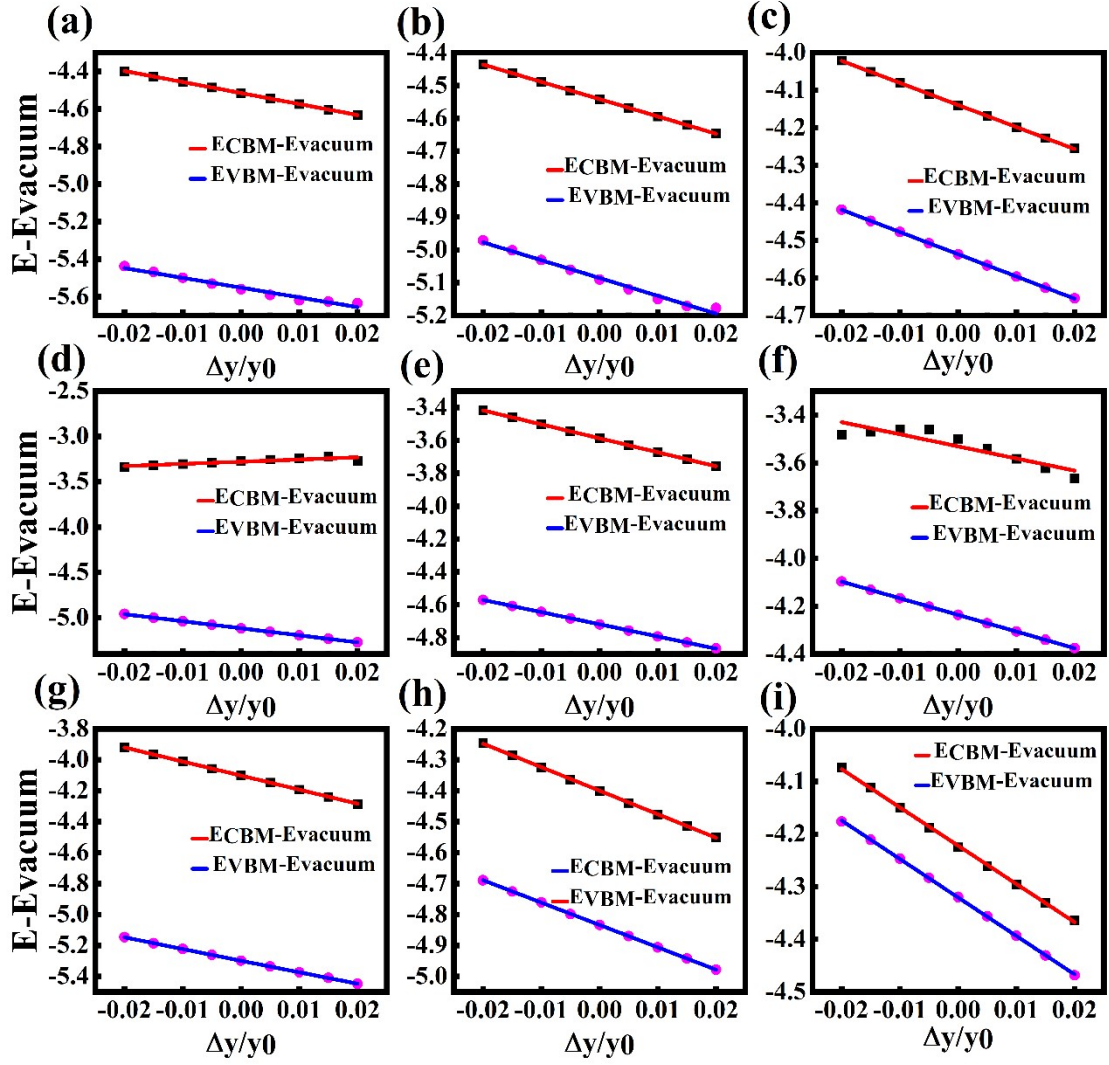

**Figure S5.** Monolayer (a)  $\beta_2$ -ZnIn<sub>2</sub>S<sub>4</sub>, (b)  $\beta_2$ -ZnIn<sub>2</sub>Se<sub>4</sub>, (c)  $\beta_2$ -ZnIn<sub>2</sub>Te<sub>4</sub>, (d)  $\beta_2$ -ZnAl<sub>2</sub>S<sub>4</sub>, (e)  $\beta_2$ -ZnAl<sub>2</sub>Se<sub>4</sub>, (f)  $\beta_2$ -ZnAl<sub>2</sub>Te<sub>4</sub>, (g)  $\beta_2$ -ZnGa<sub>2</sub>S<sub>4</sub>, (h)  $\beta_2$ -ZnGa<sub>2</sub>Se<sub>4</sub>, and (i)  $\beta_2$ -ZnGa<sub>2</sub>Te<sub>4</sub>. The energy difference and vacuum energy of CBMs and VBMs are functions of lattice expansion along with the y (armchair) direction, respectively. The slope of the blue and red lines corresponds to the DP (Deformation Potential) constant of the hole and electron in a different direction, respectively.

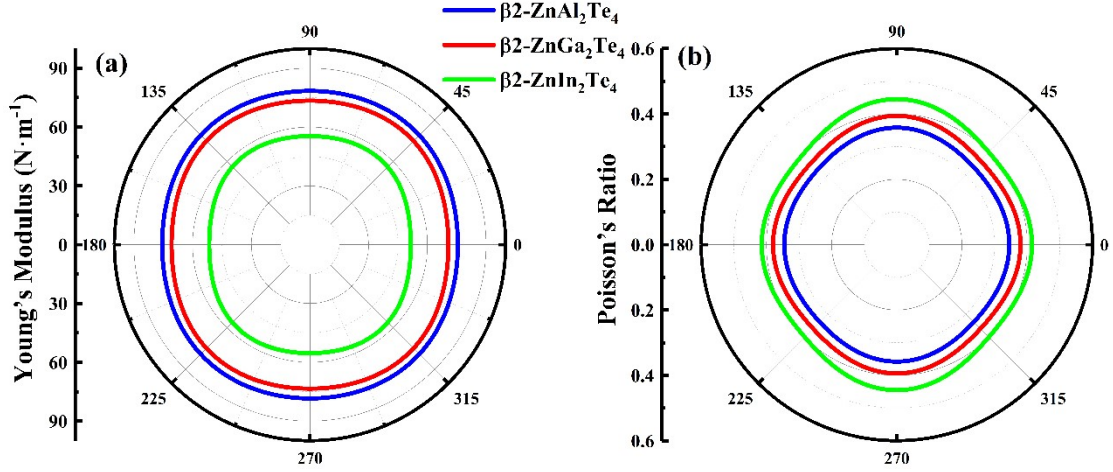

**Figure S6.** (a) Young's moduli and (b) Poisson's ratio of the  $\beta_2$ -ZnX<sub>2</sub>Te<sub>4</sub> (X= Al, Ga, and In) monolayer.

### *Carrier Mobility calculation.*

To investigate the material electron and hole transport properties, here, we use the phonon-limited scattering model of the deformation potential theory proposed by Bardeen and Shockley to predict the carrier mobility of monolayer ZnX<sub>2</sub>Z<sub>4</sub> (X = Al, Ga, and In; Z = S, Se, and Te). For the 2D semiconductor system, we used the following equation to calculate the intrinsic carrier mobility of the monolayers:

$$\mu_{2d} = \frac{e\hbar^3 C_{2d}}{K_B T m^* m_d (E_1)^2} \#(1)$$

where  $T$ ,  $K_B$ ,  $C_{2d}$ ,  $E_1$ ,  $m^*$  are the temperature, Boltzmann constant, elastic modulus of a uniformly deformed crystal, the variational constant along the transport direction, and the effective masses of electrons and holes, respectively.  $m^*$  depends on the energy change of the wave vector  $k$  along different transport directions, defined as  $m^* = \hbar^2 / (\partial^2 E / \partial^2 k)_{m_d}$  is the average effective mass, which is determined  $m_d = \sqrt{m_x m_y}$ . The valence band maximum (VBM) of electrons along the transport direction or the conduction band minimum (CBM) of the deformation situation constant  $E_1$ , determined by  $E_x = \Delta E_{lx} / (\Delta l_x / l_{x0})$  and  $E_y = \Delta E_{ly} / (\Delta l_y / l_{y0})$ . The calculation of the deformation potential  $C_{2d}$  and the distortion potential  $E_1$  in the paper is based on the equilibrium lattice structure, respectively, along with the uniaxial axis of the in-



plane cell or by applying different values of stretching and compression in the interval from -20% to 20% (taking a series of discrete values at 5% intervals) to achieve the calculation of the cell under different strains.
